# Supplementary material
Source: Springer Nature journal article supplement (https://www.springermedizin.de/resource/supplementary/12865_2009_265_MOESM7_ESM.pdf/9427632)

**WT**

**TRIF<sup>-/-</sup>**

**Day 0**

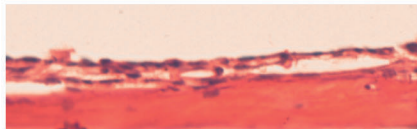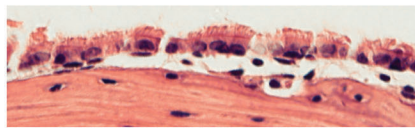

**Day 0**

**Day 1**

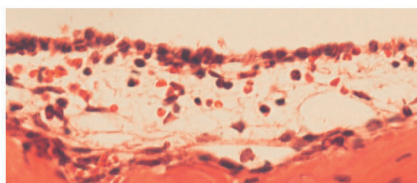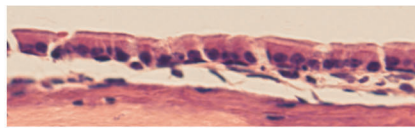

**Day 1**

**Day 2**

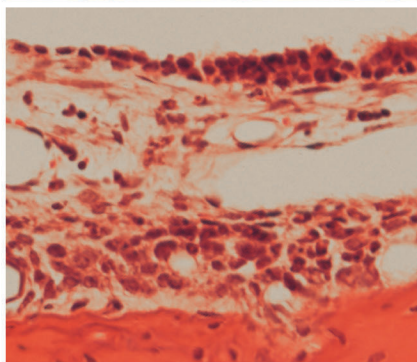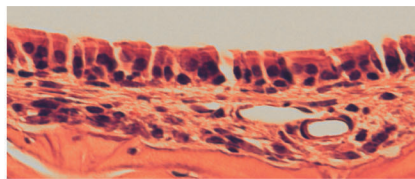

**Day 2**

**Day 3**

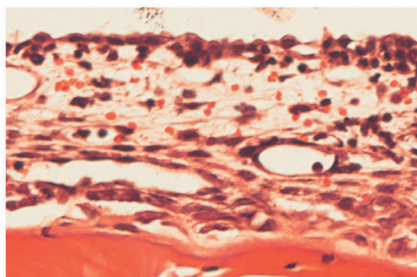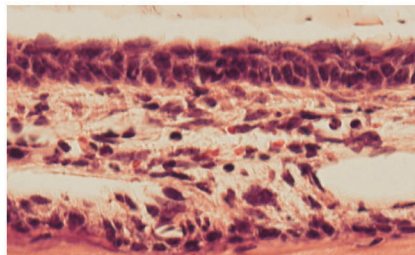

**Day 3**

**Day 5**

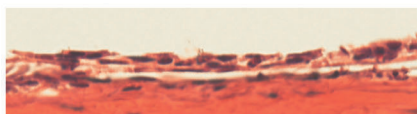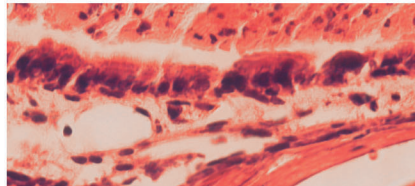

**Day 5**

**Day 10**

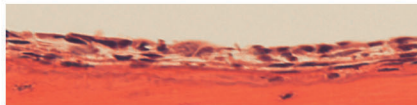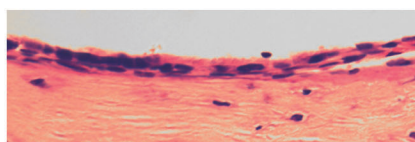

**Day 10**

Supplement: MOESM7 [file 9427632]
